# Supplementary material for: ANK2 loss-of-function variants are associated with epilepsy, and lead to impaired axon initial segment plasticity and hyperactive network activity in hiPSC-derived neuronal networks
Source: PubMed Central journal article supplement — Hum Mol Genet. 2023 May 17;32(14):2373–85. doi: 10.1093/hmg/ddad081 (PMC10321384; doi:10.1093/hmg/ddad081), 2023-05-17
Supplement: supplementary_figures_tables_ddad081.pdf [file supplementary_figures_tables_ddad081.pdf]

**A**

| Gene                      | Chr | Position | CFD  | On target | Primers                                                                                |
|---------------------------|-----|----------|------|-----------|----------------------------------------------------------------------------------------|
| <i>SCUBE2-KRT8P41</i>     | 11  | 9113950  | 0.56 | False     | Fw: TCGTCGGCAGCGTCGGGAGTGGAAGGAATTGGGG<br>Rv: GTCTCGTGGGCTCGGTTGTGCATGAGCTAGGTGGG      |
| <i>RP11-444P10.1-MITF</i> | 3   | 69769316 | 0.54 | False     | Fw: TCGTCGGCAGCGTCGGATCACTGGGTGACACAGG<br>Rv: GTCTCGTGGGCTCGGATGGCTGTCTAGGGTCCACT      |
| <i>FAF1</i>               | 1   | 51264348 | 0.39 | False     | Fw: TCGTCGGCAGCGTCGCATCAGCTCTCCAGTTATACA<br>Rv: GTCTCGTGGGCTCGGTCTTCAAGATCAGTCAGTGAGGT |

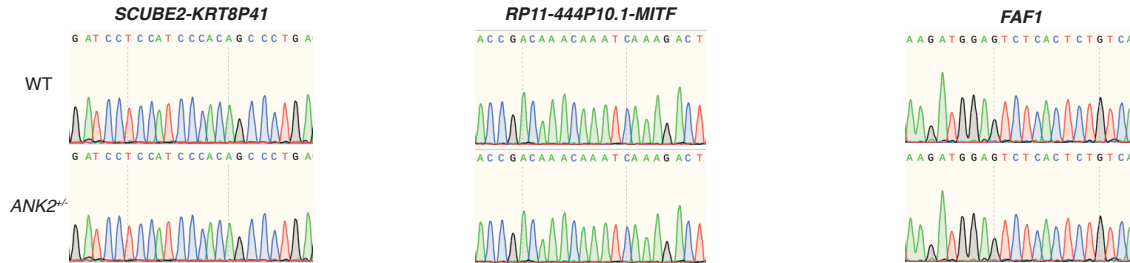

**B**

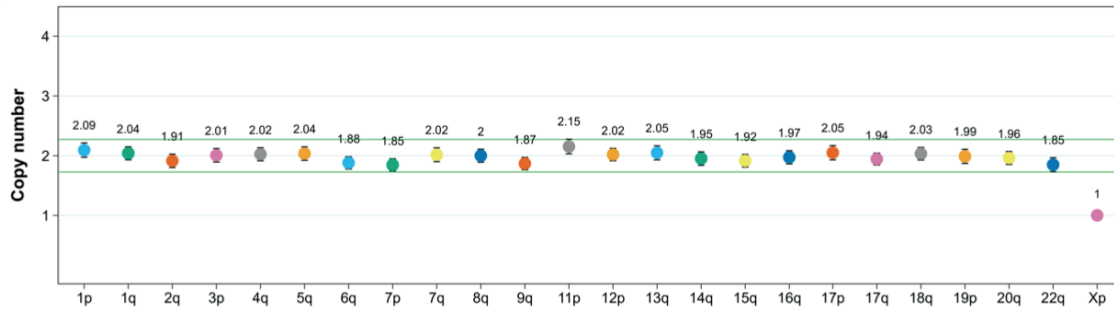

**Supplementary Fig 1. Characterization of *ANK2*<sup>+/-</sup> iPSCs. Related to Figure 2. (A)** Top three potential off-target sites have been sequenced and no mutations were detected in *ANK2*<sup>+/-</sup> iPSCs. **(B)** *ANK2*<sup>+/-</sup> iPSCs showed no genetic abnormalities after genomic editing.

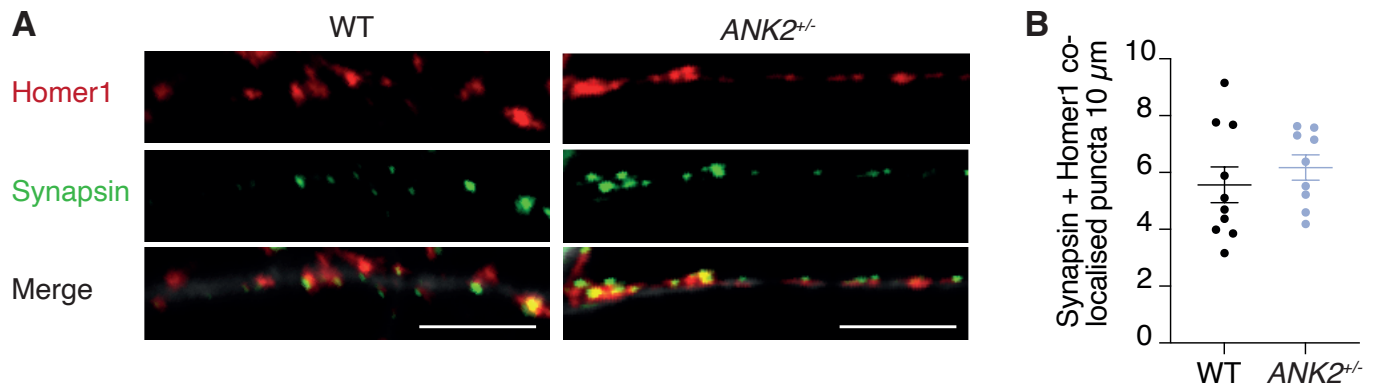

**Supplementary Fig 2. Quantification of functional synapses. Related to Figure 3. (A)** Representative images of glutamatergic synapses. Homer1 in red as a postsynaptic marker and synapsin in green as a presynaptic marker. Scale bare, 5  $\mu\text{m}$ . **(B)** Quantification of co-localized Homer1/Synapsin (number per 10  $\mu\text{m}$  dendrite).  $n = 9-10$  cells/group at DIV 28.

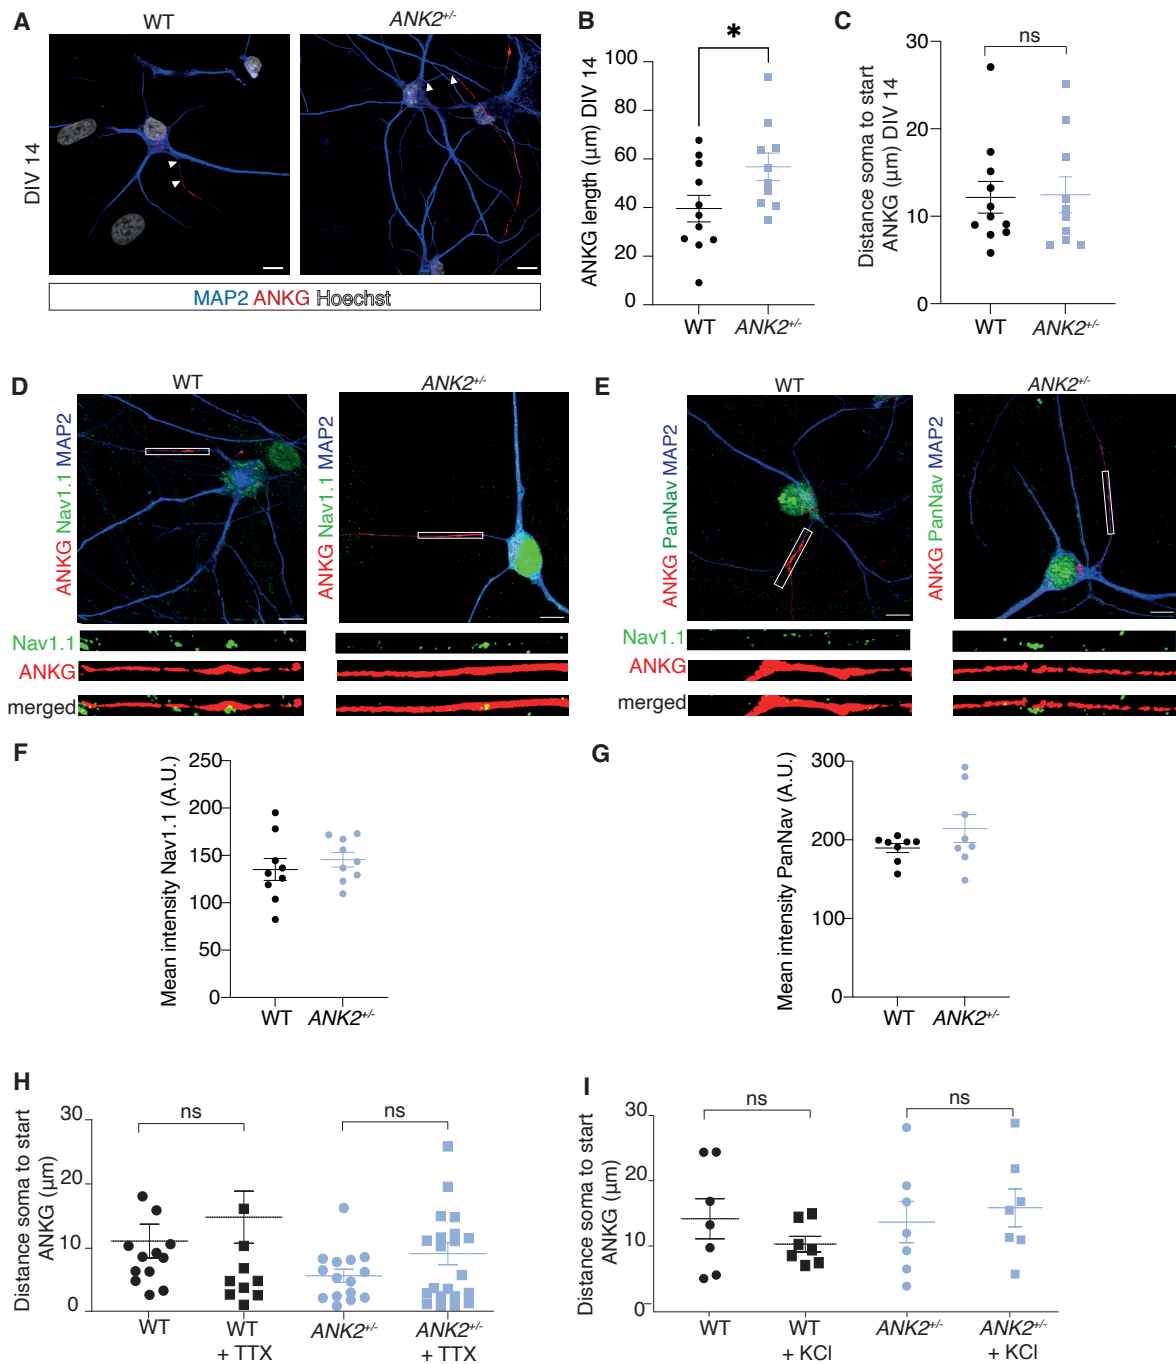

**Supplementary Fig 3. Distance soma to start AIS in WT and  $ANK2^{+/-}$  iNeurons. Related to Figure 4.** (A) Representative images of WT and  $ANK2^{+/-}$  iNeurons immunostained for MAP2 (blue) and ANKG (red) at DIV 14 (scale bar 10  $\mu\text{m}$ ). Arrowheads indicate the start and end of the AIS. (B) Quantification of ANKG length by immunostaining in WT and  $ANK2^{+/-}$  iNeurons at DIV 14,  $n = 10-11$  cells/group. (C) Quantification of the distance between soma and proximal end of ANKG staining by immunostaining in WT and  $ANK2^{+/-}$  iNeurons at DIV 14,  $n = 10-11$  cells/group. (D) Representative images of WT and  $ANK2^{+/-}$  iNeurons

immunostained for ANKG (red) Nav1.1 (green) and MAP2 (blue) at DIV 28 (scale bar 10  $\mu\text{m}$ ). Boxes indicate a zoom-in of the AIS co-expressed with Nav1.1. **(E)** Representative images of WT and *ANK2*<sup>+/-</sup> iNeurons immunostained for ANKG (red) PanNav (green) and MAP2 (blue) at DIV 28 (scale bar 10  $\mu\text{m}$ ). Boxes indicate a zoom-in of the AIS co-expressed with PanNav **(F)** Quantification of mean intensity of Nav1.1 in the AIS at DIV 28,  $n = 8-9$  cells/group. **(F)** Quantification of mean intensity of PanNav in the AIS at DIV 28,  $n = 8$  cells/group. **(H)** Quantification of distance soma to start ANKG shown by immunostaining in WT and *ANK2*<sup>+/-</sup> iNeurons under basal condition or treated with 1  $\mu\text{M}$  TTX,  $n = 9-21$  cells/group. Analyzed by one-way ANOVA and Tukey's post hoc analysis. **(I)** Quantification of distance soma to start ANKG shown by immunostaining in WT and *ANK2*<sup>+/-</sup> iNeurons under basal condition or treated with 10 mM KCl,  $n = 7$  cells/group. Analyzed by one-way ANOVA and Tukey's post hoc analysis.



|                                  | <b>Individual 1</b>                                 | <b>Individual 2</b>            | <b>Individual 3</b>                | <b>Individual 4</b>      | <b>Individual 5</b>    | <b>Individual 6</b>           | <b>Individual 7</b>      | <b>Individual 8</b>                     | <b>Individual 9</b>         | <b>Individual 10</b>                        | <b>Individual 11</b>                             | <b>Individual 12</b>        |
|----------------------------------|-----------------------------------------------------|--------------------------------|------------------------------------|--------------------------|------------------------|-------------------------------|--------------------------|-----------------------------------------|-----------------------------|---------------------------------------------|--------------------------------------------------|-----------------------------|
| <b>Age (year)</b>                | 17                                                  | 13                             | 15                                 | 12                       | 10                     | 18                            | 9                        | 12                                      | 9                           | 1.75                                        | 1.6                                              | 7                           |
| <b>Sex</b>                       | Male                                                | Female                         | Male                               | Female                   | Male                   | Male                          | Female                   | Female                                  | Male                        | Male                                        | Female                                           | Male                        |
| <b>Genomic location (GRCH37)</b> | g.114257872_114257873del                            | g.114239672G>A                 | g.114170950C>T                     | g.113682175_114039872del | g.114209543G>A         | g.114251520C>T                | g.113905001_114223000del | g.114177059_114177060del                | g.114277134_114277135del    | g.114179468G>A                              | g.114284505G>T                                   | g.114163336C>T              |
| <b>cDNA location</b>             | c.3632_3633del                                      | c.2797-1G>A                    | c.922C>T                           | c.-28871085-55700del     | c.2179-1G>A            | c.3019C>T                     | c.-65884_2476923del      | c.1159_1160del                          | c.7360_7361del              | c.1288-1G>A                                 | c.10768G>T                                       | c.862C>T                    |
| <b>Protein change</b>            | p.Ser1244Met(fs*5)                                  | p.(?);-                        | p.Arg308*                          | N/a                      | p.(?);-                | p.Arg1007*                    | N/a                      | p.Lys387Glu(fs*10)                      | p.Ser2454Ile(fs*7)          | p.(?);-                                     | p.Glu3590*                                       | p.Arg288*                   |
| <b>Mutation type</b>             | Deletion leading to frameshift                      | Probable leading to frameshift | Nonsense                           | Deletion                 | Splice site variant    | Nonsense                      | Deletion                 | Deletion leading to frameshift          | Indel leading to frameshift | Splice site variant                         | Nonsense                                         | Nonsense                    |
| <b>Inheritance</b>               | <i>De novo</i>                                      | <i>De novo</i>                 | <i>De novo</i>                     | Unknown                  | <i>De novo</i>         | <i>De novo</i>                | <i>De novo</i>           | <i>De novo</i>                          | <i>De novo</i>              | <i>De novo</i>                              | <i>De novo</i>                                   | <i>De novo</i>              |
| <b>ID / DD</b>                   | Mild                                                | Mild                           | Mild                               | Mild                     | Mild *                 | Severe                        | None                     | Moderate                                | Mild                        | None                                        | None                                             | Mild                        |
| <b>Speech development</b>        | Delayed                                             | Delayed                        | Delayed                            | Unknown                  | Unknown                | Severely delayed (non-verbal) | Unknown                  | Delayed with regression                 | Severely delayed            | Normal (speaks and uses words at 19 months) | Babbles and uses syllables, no words (14 months) | Delayed                     |
| <b>Motor development</b>         | Unknown                                             | Unknown                        | Delayed                            | Unknown                  | unknown                | Yes                           | Unknown                  | Normal                                  | Normal                      | Normal                                      | Normal                                           | Delayed (walking 23 months) |
| <b>Autism spectrum disorder</b>  | Yes                                                 | Yes                            | Probable                           | Yes                      | Unknown                | Yes                           | Yes                      | No                                      | No                          | N/a                                         | N/a                                              | Yes                         |
| <b>Other behavioral problems</b> | Gilles de la Tourette, ADHD, DCD                    | Attention difficulties         | ADD                                | Unknown                  | Unknown                | Agitation, sleep disturbances | Unknown                  | ADHD, agitation and aggression          | ADHD, aggressiveness        | -                                           | -                                                | -                           |
| <b>Medication</b>                | Dex-amphetamine, risperidone                        | -                              | Sertraline, methylphenidate        | -                        | Dexamethylphenidate    | -                             | -                        | Risperidone, melatonin                  | -                           | -                                           | -                                                | -                           |
| <b>Congenital anomalies</b>      | None                                                | Hyperlaxity                    | None                               | Congenital hip dysplasia | Generalized overgrowth | -                             | Unknown                  | Severe laryngomalacia (day 8)           | -                           | -                                           | -                                                | -                           |
| <b>Hypotonia</b>                 | Possible                                            | Yes                            | Yes                                | Unknown                  | Yes                    | No                            | Unknown                  | No                                      | Yes                         | Yes                                         | No                                               | -                           |
| <b>Brain MRI</b>                 | -                                                   | Normal                         | Normal                             | -                        | Unknown                | Normal                        | -                        | Abnormal (hyperintensities and atrophy) | - (normal CT)               | Normal                                      | Normal                                           | -                           |
| <b>ECG</b>                       | Intraventricular conduction delay                   | Normal                         | Intraventricular conduction delay  | Normal                   | Normal                 | None                          | Unknown                  | Normal                                  | Normal                      | Unknown                                     | Unknown                                          | Not performed               |
| <b>Structural abnormalities</b>  | Small atrial septal defect and patent foramen ovale | None                           | Small atrial septal defect type II | None                     | None                   | None                          | Unknown                  | None                                    | Unknown                     | Unknown                                     | Unknown                                          | -                           |
| <b>Epilepsy</b>                  | No                                                  | Yes                            | Yes                                | No                       | Yes                    | Yes                           | No                       | Yes                                     | No                          | Yes                                         | Yes                                              | -                           |

|       |                                     |                                                                                                                                                                                            |  |                                                                  |                                                                                                                                 |                                              |  |             |   |  |                                                                             |   |
|-------|-------------------------------------|--------------------------------------------------------------------------------------------------------------------------------------------------------------------------------------------|--|------------------------------------------------------------------|---------------------------------------------------------------------------------------------------------------------------------|----------------------------------------------|--|-------------|---|--|-----------------------------------------------------------------------------|---|
| Other | NRXN1 variant, maternally inherited | KNCQ3 variant, paternally inherited (paternal grandmother also carrier) and 18p11.32 duplication, maternally inherited. Mother was diagnosed with classical autism, but is highly educated |  | Severe feeding difficulties for years (needing peg tube feeding) | Maternally inherited c.1555G>A (p.E519K) VUS in SCN9A; paternally inherited c.8120G>A (p.R2707Q) VUS in TRIO. ALTE at 11 months | Missense variant ALG13, maternally inherited |  | Sleep apnea | - |  | Mild increase of muscle tone during infancy with mild coordination deficits | - |
|-------|-------------------------------------|--------------------------------------------------------------------------------------------------------------------------------------------------------------------------------------------|--|------------------------------------------------------------------|---------------------------------------------------------------------------------------------------------------------------------|----------------------------------------------|--|-------------|---|--|-----------------------------------------------------------------------------|---|

VNS: vagal nerve stimulator. ADHD: attention deficit hyperactivity disorder. ADD: attention deficit disorder. DCD: developmental coordination disorder. ALTE: apparent life threatening event. VUS: variant of unknown significance.

Comments table 1: \* IQ not tested; estimated mild ID, patient has individualized education plan. ID = intellectual disability. DD = developmental delay. IS= infantile spasms. LGS= lennox-gastaut syndrome. ALTE= apparent life threatening event, GTCS= generalized tonic-clonic seizures.

**Supplementary Table 1: General characteristics and variants of *ANK2*-related patients associated with neurodevelopmental disorder**

| <b>g.DNA</b>     | <b>c.DNA<br/>(NM_001148.5)</b> | <b>Protein<br/>change</b> | <b>Protein<br/>effect</b> | <b>SampleID</b>            | <b>Reference<br/>article</b> | <b>Reported<br/>phenotype</b> |
|------------------|--------------------------------|---------------------------|---------------------------|----------------------------|------------------------------|-------------------------------|
| 4:g.114155754G>A | c.483+2339G>A                  | p.?                       | Intronic variant          | n/a                        | Kong 2012                    | ASD                           |
| 4:g.114163415C>G | c.891+50C>G                    | p.?                       | Intronic variant          | SSC03315                   | Satterstrom 2020             | ASD                           |
| 4:g.114170950C>T | c.922C>T                       | p.(Arg308Ter)             | Nonse                     | Patient 3                  |                              | NDD, epilepsy                 |
| 4:g.114177051T>G | c.1151T>G                      | p.(Leu384Arg)             | Mis                       | 08C74775                   | Satterstrom 2020             | NDD                           |
| 4:g.114177060del | c.1160del                      | p.(Lys387ArgfsTer10)      | Frame shift               | Patient 8                  |                              | NDD, epilepsy                 |
| 4:g.114179468G>T | c.1288-1G>T                    | p.?                       | Splice acceptor variant   | Patient 10                 |                              | Epilepsy                      |
| 4:g.114186083C>T | c.1417C>T                      | p.(Arg473Ter)             | Nonse                     | 127b                       | Ji 2019                      | NDD, epilepsy                 |
| 4:g.114203820G>A | c.1882-11G>A                   | p.?                       | Intronic variant          | 13882                      | Iossifov 2014                | ASD                           |
| 4:g.114203886C>T | c.1937C>T                      | p.(Ser646Phe)             | Mis                       | n/a                        | Swayne 2017                  | Cardiac arrhythmia, epilepsy  |
| 4:g.114209543G>A | c.2179-1G>A                    | p.?                       | Splice acceptor variant   | Patient 5                  |                              | NDD, epilepsy                 |
| 4:g.114214640C>G | c.2421C>G                      | p.(Ile807Met)             | Mis                       | UK10K_SK<br>USE508017<br>4 | De_Rubeis_Nature_2014        | ASD                           |

|                                |                    |                       |                                       |                    |                     |                              |
|--------------------------------|--------------------|-----------------------|---------------------------------------|--------------------|---------------------|------------------------------|
| 4:g.114232545C>T               | c.2683C>T          | p.(Arg895Ter)         | Nonse<br>nse                          | 12645              | lossifov<br>2014    | ASD                          |
| 4:g.114239672G>A               | c.2797-1G>A        | p.?                   | Splice<br>accept<br>or<br>varian<br>t | Patient 2          | Lelieveld<br>2016   | NDD                          |
| 4:g.114251469C>T               | c.2968C>T          | p.(Arg990Ter)         | Nonse<br>nse                          | 14256              | lossifov<br>2014    | ASD                          |
| 4:g.114251470G>A               | c.2969G>A          | p.(Arg990Gln)         | Misse<br>nse                          | n/a                | Smith 2015          | Cardi<br>ac<br>arrhy<br>tmia |
| 4:g.114251520C>T               | c.3019C>T          | p.(Arg1007Ter)        | Nonse<br>nse                          | Patient 6          |                     | NDD,<br>epile<br>psy         |
| 4:g.114254247C>T               | c.3262C>T          | p.(Arg1088Ter)        | Nonse<br>nse                          | DEASD_014<br>0_001 | Rubeis 2014         | ASD                          |
| 4:g.114254305A>G               | c.3320A>G          | p.(Glu1107Gly)        | Misse<br>nse                          | DDD4K.042<br>91    | DDD 2017            | NDD                          |
| 4:g.114257872del               | c.3731del          | p.(Ser1244MetfsTer5)  | Frame<br>shift                        | Patient 1          |                     | NDD                          |
| 4:g.114264189C>G               | c.4139C>G          | p.(Pro1380Arg)        | Misse<br>nse                          | 10C105731          | Rubeis 2014         | ASD                          |
| 4:g.114267127G>A               | c.4320G>A          | p.(Leu1440=)          | Synon<br>ymou<br>s                    | 236-15-DR          | Satterstrom<br>2020 | ASD                          |
| 4:g.114269433A>G               | c.4373A>G          | p.(Glu1458Gly)        | Misse<br>nse                          | n/a                | Mohler 2003         | Cardi<br>ac<br>arrhy<br>tmia |
| 4:g.114274438T>A               | c.4664T>A          | p.(Val1555Asp)        | Misse<br>nse                          | n/a                | Mohler 2007         | Cardi<br>ac<br>arrhy<br>tmia |
| 4:g.114275304C>T               | c.5530C>T          | p.(Pro1844Ser)        | Misse<br>nse                          | 14130              | lossifov<br>2014    | ASD                          |
| 4:g.114275804C>A               | c.6030C>A          | p.(Leu2010=)          | Synon<br>ymou<br>s                    | 14367.s1           | Krumm 2015          | ASD                          |
| 4:g.114276678_114276691del     | c.6904_6917del     | p.(Thr2302PhefsTer16) | Frame<br>shift                        | 676-05-<br>104737  | Satterstrom<br>2020 | ASD                          |
| 4:g.114277602del               | c.7828del          | p.(Asp2610ThrfsTer23) | Frame<br>shift                        | 13768              | lossifov<br>2014    | ASD                          |
| 4:g.114277134_114277135delinsA | c.7360_7361delinsA | p.(Ser2454lefsTer7)   | Frame<br>shift                        | Patient 9          |                     | NDD                          |

|                  |            |                       |             |             |                       |                    |
|------------------|------------|-----------------------|-------------|-------------|-----------------------|--------------------|
| 4:g.114278455del | c.8681del  | p.(Asp2894AlafsTer20) | Frame shift | Patient 4   |                       | NDD                |
| 4:g.114279628T>C | c.9854T>C  | p.(Ile3285Thr)        | Misense     | n/a         | Krogh Broendberg 2015 | Cardiac arrhythmia |
| 4:g.114280060A>T | c.10286A>T | p.(Glu3429Val)        | Misense     | 1-0234_004  | Yuen 2015             | ASD                |
| 4:g.114284505G>T | c.10768G>T | p.(Glu3590Ter)        | Nonstop     | Patient 11  |                       | Epilepsy           |
| 4:g.114288907C>A | c.11218C>A | p.(Leu3740Ile)        | Misense     | n/a         | Mohler 2004           | Cardiac arrhythmia |
| 4:g.114288920C>A | c.11231C>A | p.(Thr3744Asn)        | Misense     | n/a         | Mohler 2004           | Cardiac arrhythmia |
| 4:g.114294462C>T | c.11716C>T | p.(Arg3906Trp)        | Misense     | n/a         | Mohler 2004           | Cardiac arrhythmia |
| 4:g.114294537G>A | c.11791G>A | p.(Glu3931Lys)        | Misense     | n/a         | Mohler 2004           | Cardiac arrhythmia |
| 4:g.114302677A>G | c.*50A>G   | p.?                   |             | DDD4K.01859 | DDD 2017              | NDD                |
| 4:g.114302686G>A | c.*59G>A   | p.?                   |             | 212-21046-1 | Stessman              | NDD                |

**Supplementary Table 2: Variants in *ANK2* associated with neurodevelopmental disorder and epilepsy of this cohort and previously reported in literature using NM\_001148.5 (GRCh37)**
